# Supplementary material
Source: publisher site journal article supplement (https://www.degruyterbrill.com/publication/isbn/9783110300581/downloadAsset/9783110300581_Inhaltsverzeichnis.pdf)
Supplement: Supplementary file 1 [file 9783110300581_Inhaltsverzeichnis.pdf]

# Inhalt

|                   |    |
|-------------------|----|
| Vorwort . . . . . | IX |
|-------------------|----|

SIGRID HIRBODIAN

|                                                                                                                                 |   |
|---------------------------------------------------------------------------------------------------------------------------------|---|
| Dominikanerinnenreform und Familienpolitik<br>Die Einführung der Observanz im Kontext<br>städtischer Sozialgeschichte . . . . . | I |
|---------------------------------------------------------------------------------------------------------------------------------|---|

ANNETTE VOLPING

|                                                                                                                                          |    |
|------------------------------------------------------------------------------------------------------------------------------------------|----|
| <i>Du bist den Rin herabe geflossen</i><br>Topographical Metaphors and Interior Geography<br>in the Sermons of Johannes Tauler . . . . . | 17 |
|------------------------------------------------------------------------------------------------------------------------------------------|----|

MARTINA BACKES

|                                                                                              |    |
|----------------------------------------------------------------------------------------------|----|
| Eine Stadt voll der Gnaden<br>Straßburg aus der Perspektive Gertruds von Ortenberg . . . . . | 29 |
|----------------------------------------------------------------------------------------------|----|

BALÁZS J. NEMES

|                                                                                                                             |    |
|-----------------------------------------------------------------------------------------------------------------------------|----|
| Der »entstellte« Eckhart<br>Eckhart-Handschriften im Straßburger Dominikanerinnenkloster<br>St. Nikolaus in undis . . . . . | 39 |
|-----------------------------------------------------------------------------------------------------------------------------|----|

ALMUT SUERBAUM

|                                                                                               |    |
|-----------------------------------------------------------------------------------------------|----|
| <i>Es kommt ein Schiff, geladen</i><br>Mouvance in mystischen Liedern aus Straßburg . . . . . | 99 |
|-----------------------------------------------------------------------------------------------|----|

JEFFREY F. HAMBURGER

|                                                                                                                                         |     |
|-----------------------------------------------------------------------------------------------------------------------------------------|-----|
| Visible Speech<br>Imagining Scripture in the Prayer Book of Ursula Begerin<br>and the Medieval Tradition of Word Illustration . . . . . | 117 |
|-----------------------------------------------------------------------------------------------------------------------------------------|-----|

MONIKA STUDER

|                                                                                                                                                                                                                               |     |
|-------------------------------------------------------------------------------------------------------------------------------------------------------------------------------------------------------------------------------|-----|
| Antonius der Einsiedler trifft Caesarius von Heisterbach<br>Zur gemeinsamen Überlieferung von Exempla der<br>»Alemannischen Vitaspatrum« und des »Dialogus miraculorum«<br>in Straßburger Handschriften und Drucken . . . . . | 167 |
|-------------------------------------------------------------------------------------------------------------------------------------------------------------------------------------------------------------------------------|-----|

ANNE WINSTON-ALLEN

- Networking in Medieval Strasbourg  
 Cross-Order Collaboration in Book Illustration among  
 Women's Reformed Convents . . . . . 197

SABINE KLAPP

- Pragmatische Schriftlichkeit in Straßburger Frauenklöstern  
 des späten Mittelalters . . . . . 213

RACHA KIRAKOSIAN

- Wie eine Legende Geschichte macht  
 Das Gottesurteil der heiligen Richgard im spätmittelalterlichen Straßburg 239

PETER RÜCKERT

- Die heilige Odilia und ihre Verehrung im späteren Mittelalter . . . . . 277

SABINE KLAPP / PETER RÜCKERT

- Die Ordnung der Küsterin: Auszug aus den Statuten  
 für das Frauenstift Hohenburg von 1444  
 Edition und Kommentar . . . . . 299

CHARLOTTE A. STANFORD

- Envisioning Remembrance  
 Two Late Fifteenth-Century Tombs in Strasbourg Cathedral . . . . . 311

PETER SCHMIDT

- Historiographie und persönliche Aneignung von Geschichte  
 Die wiederentdeckte Künastsche Handschrift der Straßburger  
 Chronik des Jakob Twinger von Königshofen . . . . . 337

NIKOLAUS HENKEL

- Das Bild als Wissenssumme  
 Die Holzschnitte in Sebastian Brants Vergil-Ausgabe, Straßburg 1502 . . . 379

BARBARA FLEITH

- Remotus a tumultu civitatis?*  
 Die Johanniterkommende »zum Grünen Wörth« im 15. Jahrhundert . . . 411

STEPHEN MOSSMAN / NIGEL F. PALMER

- Ulrich der Johanniter vom Grünen Wörth and his Adaptation of the  
 »Liber amoris«  
 A Critical Edition of the »Hoheliedpredigt« and of its German Precursor  
 »Die Höhenflüge der Seele« . . . . . 469

|                                                        |     |
|--------------------------------------------------------|-----|
| Abkürzungsverzeichnis . . . . .                        | 521 |
| Register der Namen, Personen, Werke und Orte . . . . . | 523 |
| Handschriftenregister . . . . .                        | 547 |
